CORRECTION

# Correction: Universal varicella vaccination in Denmark: Modeling public health impact, age-shift, and cost-effectiveness

Colleen Burgess, Salome Samant, Thomas leFevre, Carsten Schade Larsen, Manjiri Pawaskar

In the Funding section, the role of the funder is incorrect. The correct Funding statement is: This study was funded by Merck Sharp & Dohme LLC, a subsidiary of Merck & Co., Inc., Rahway, NJ, USA. The funder provided support in the form of salaries or consulting fees for CB, SS, TL, CSL, and MP, and had input in the study design, data collection and analysis, decision to publish, and preparation of the manuscript.

The authors requested this update prior to the article's publication, but due to an internal error the updated statement was not incorporated into the article before its publication date. The publisher apologizes for the error.

## Reference

1. Burgess C, Samant S, leFevre T, Schade Larsen C, Pawaskar M (2023) Universal varicella vaccination in Denmark: Modeling public health impact, age-shift, and cost-effectiveness. PLOS Glob Public Health 3(4): e0001743. <https://doi.org/10.1371/journal.pgph.0001743> PMID: 37018165

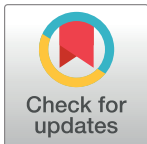

## OPEN ACCESS

**Citation:** Burgess C, Samant S, leFevre T, Larsen CS, Pawaskar M (2023) Correction: Universal varicella vaccination in Denmark: Modeling public health impact, age-shift, and cost-effectiveness. PLOS Glob Public Health 3(9): e0002407. <https://doi.org/10.1371/journal.pgph.0002407>

**Published:** September 14, 2023

**Copyright:** © 2023 Burgess et al. This is an open access article distributed under the terms of the [Creative Commons Attribution License](https://creativecommons.org/licenses/by/4.0/), which permits unrestricted use, distribution, and reproduction in any medium, provided the original author and source are credited.
